# Supplementary material for: A general chiral selector immobilized on silica magnetic microspheres for direct separation of racemates
Source: Royal Society of Chemistry journal article supplement (doi:10.1039/c2jm30372h), 2012-01-01
Supplement: c2jm30372h.pdf [file c2jm30372h.pdf]

## Supporting Information

### A General Chiral Selector Immobilized on Silica Magnetic Microspheres for Direct Separation of Racemates

Yun Wei<sup>\*</sup>, Ailin Tian, Yan Li, Xiong Wang, Bo Cao

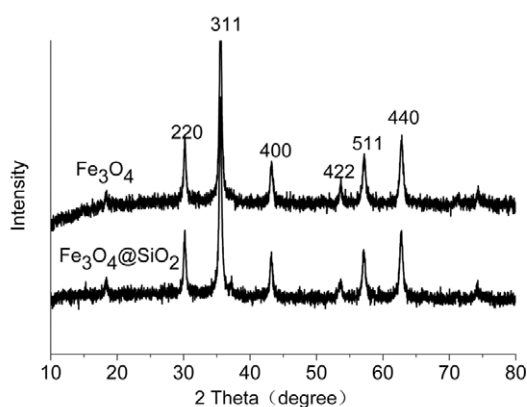

Figure S1. XRD patterns of Fe<sub>3</sub>O<sub>4</sub> and Fe<sub>3</sub>O<sub>4</sub>@SiO<sub>2</sub> microspheres.

Peaks at 18.290 °, 30.157 °, 35.587 °, 43.242 °, 53.679 °, 57.183 ° and 62.850 ° were assigned to (111), (220), (311), (400), (422), (511) and (440) reflections spectrum of Fe<sub>3</sub>O<sub>4</sub>, respectively.

The average crystallite size  $D$  of the particles is calculated from the Scherrer equation:  $D = K\lambda/(\beta\cos\theta)$ , where  $K$  is the Debye-Scherrer constant (0.89),  $\lambda$  is the X-ray wavelength,  $\beta$  is the peak width of half-maximum, and  $\theta$  is the Bragg diffraction angle. Here, the (311) peak of the highest intensity was picked out to evaluate the particle diameter of Fe<sub>3</sub>O<sub>4</sub>. And  $D$  was calculated to be about 18 nm. No apparent change was observed in XRD spectra after silica coating, indicating that the silica shell formed on the surface of magnetite was amorphous.

<sup>\*</sup> Corresponding author: Yun WEI, State Key Laboratory of Chemical Resource Engineering, Beijing University of Chemical Technology, 15 Beisanhuan East Road, Chaoyang District, Beijing 100029, China, Tel & fax: 0086 10 64442928. E-mail: [weiyun@mail.buct.edu.cn](mailto:weiyun@mail.buct.edu.cn)

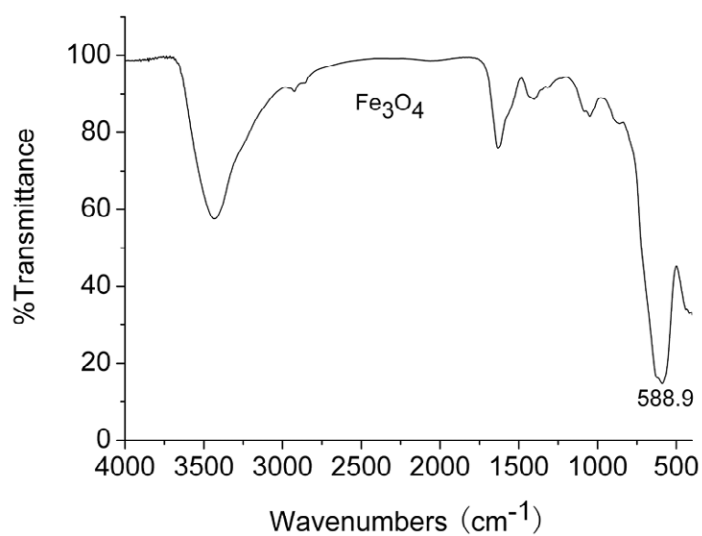

Figure S2 FT-IR spectrum of Fe<sub>3</sub>O<sub>4</sub>.  
Characteristic absorption of Fe-O bond was observed at 588.9 cm<sup>-1</sup>.

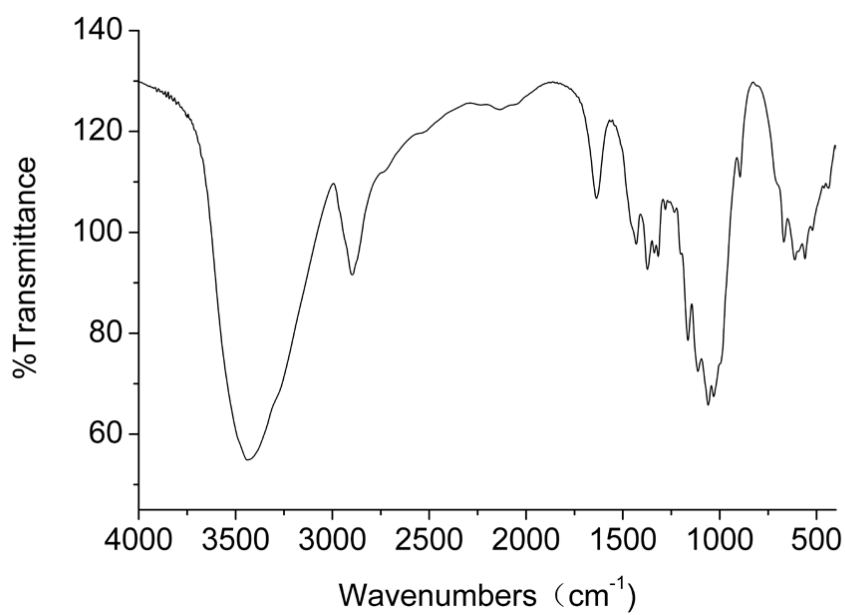

Figure S3 FT-IR spectra of microcrystalline cellulose (MC)

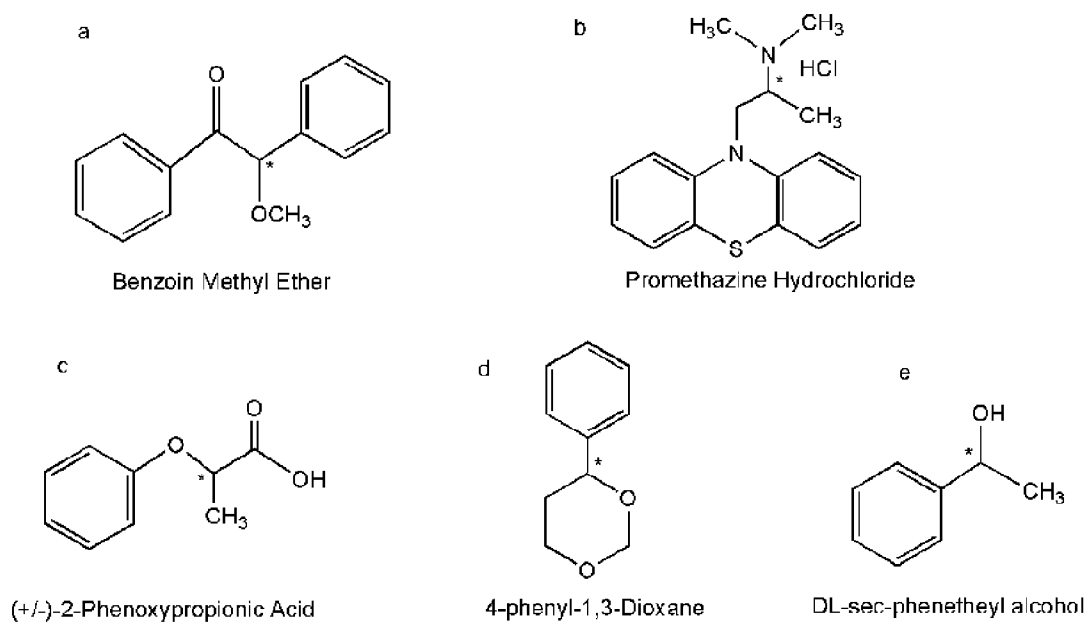

Figure S4 Chemical structures of five racemates

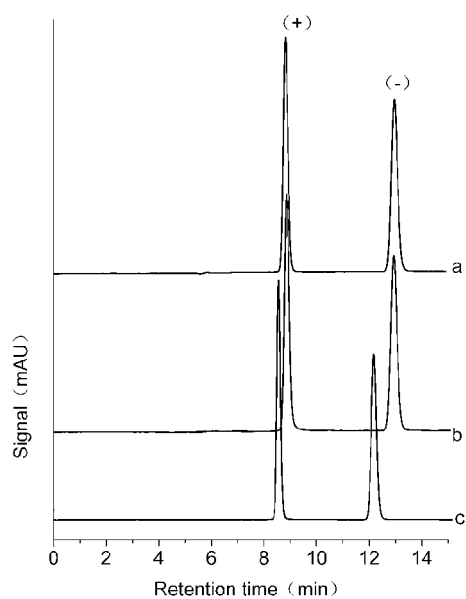

Figure S5 HPLC analysis of racemate benzoin methyl ether (a), supernatant after interaction with CMM collected immediately (b) and supernatant after remaining with CMM for 15min (c)

Table S1 HPLC analysis of racemate benzoin methyl ether

| Sample | Peak Area                |                          |
|--------|--------------------------|--------------------------|
|        | (+) benzoin methyl ether | (-) benzoin methyl ether |
| a      | $1.31 \times 10^6$       | $1.31 \times 10^6$       |
| b      | $1.19 \times 10^6$       | $1.11 \times 10^6$       |
| c      | $1.18 \times 10^6$       | $1.18 \times 10^6$       |

Racemate sample of benzoin methyl ether (a), supernatant after interaction with CMM collected immediately (b) and supernatant after remaining with CMM for 15min (c), determined by HPLC on a chiral stationary phase. Retention times of (+) benzoin methyl ether and (-) benzoin methyl ether are 8.886 min and 13.022 min respectively.
